# Supplementary material
Source: PubMed Central journal article supplement (PMC3793610)
Supplement: supp_M039834_Supplementaldata.pdf [file supp_M039834_Supplementaldata.pdf]

**Table S1.** Sugar assimilation test of *R. gnavus* N53, *R. gnavus* ATCC 29149<sup>T</sup>, *R. gnavus*, and *Ruminococcus* sp. PO1-3 with API 20A.

|                         | <i>R. gnavus</i> N53 | <i>R. gnavus</i><br>ATCC 29149 <sup>T</sup> | <i>R. gnavus</i> <sup>b</sup> | <i>Ruminococcus</i> sp.<br>PO1-3 <sup>c</sup> |
|-------------------------|----------------------|---------------------------------------------|-------------------------------|-----------------------------------------------|
| Indole                  | -                    | -                                           | /                             | -                                             |
| Urease                  | -                    | -                                           | /                             | /                                             |
| Glucose                 | +                    | +                                           | +                             | +                                             |
| Mannitol                | -                    | -                                           | -                             | -                                             |
| Lactose                 | -                    | -                                           | -,+                           | -                                             |
| Saccharose <sup>a</sup> | +                    | -                                           | +,-                           | +                                             |
| Maltose                 | +                    | +                                           | +                             | +                                             |
| Salicin                 | +                    | +                                           | +                             | +                                             |
| Xylose                  | +                    | +                                           | +                             | +                                             |
| Arabinose               | +                    | +                                           | +                             | +                                             |
| Gelatin liquefaction    | -                    | -                                           | /                             | -                                             |
| Esculin                 | /                    | /                                           | (+)                           | (+)                                           |
| Glycerol                | -                    | -                                           | /                             | -                                             |
| Cellobiose              | -                    | -                                           | -                             | -                                             |
| Mannose <sup>a</sup>    | -                    | -                                           | -                             | +                                             |
| Melezitose              | -                    | -                                           | /                             | -                                             |
| Raffinose               | +                    | +                                           | +                             | +                                             |
| Sorbitol                | -                    | -                                           | -                             | -                                             |
| Rhamnose                | +                    | +                                           | +                             | +                                             |
| Trehalose               | -                    | -                                           | -                             | -                                             |
| Catalase                | -                    | -                                           | /                             | /                                             |

<sup>a</sup>Assimilation of saccharose differs between *R. gnavus* N53 and *R. gnavus* ATCC 29149<sup>T</sup>.

Assimilation of mannose differs between *R. gnavus* N53 and *Ruminococcus* PO1-3.

<sup>b</sup>Data from Moore, W. E. C. *et al.*, 1976. *Int. J. Syst. Evol. Microbiol.* **26**: 238-252.

<sup>c</sup>Data from Hattori, M. *et al.*, 1985. *Chem. Pharm. Bull.* **33**: 210-217.

Symbols: -, negative reaction; (+), weak reaction; +, positive reaction; /, not reported. Where two symbols are shown, the first was more frequent, and the second was observed less frequently.

**Table S2.** Sugar assimilation test of *R. gnavus* strains N53 and ATCC 29149<sup>T</sup> using API rapid ID 32A.

|                                            | <i>R. gnavus</i> N53 | <i>R. gnavus</i> ATCC 29149 <sup>T</sup> |
|--------------------------------------------|----------------------|------------------------------------------|
| Arginine dihydrolase                       | +                    | +                                        |
| $\alpha$ -Galactosidase                    | +                    | +                                        |
| $\beta$ -Galactosidase                     | +                    | +                                        |
| 6-Phospho- $\beta$ -galactosidase          | -                    | -                                        |
| $\alpha$ -Glucosidase                      | +                    | +                                        |
| $\beta$ -Glucosidase                       | +                    | +                                        |
| $\alpha$ -Arabinosidase                    | -                    | -                                        |
| $\beta$ -Glucuronidase                     | -                    | -                                        |
| <i>N</i> -Acetyl- $\beta$ -glucosaminidase | -                    | -                                        |
| Mannose                                    | -                    | -                                        |
| Raffinose                                  | -                    | -                                        |
| Glutamic acid decarboxylase                | -                    | -                                        |
| $\alpha$ -Fucosidase <sup>a</sup>          | +, -                 | -                                        |
| Nitrates reduction                         | -                    | -                                        |
| Indole                                     | -                    | -                                        |
| Alkaline phosphatase                       | +                    | +                                        |
| Arginine arylamidase                       | +                    | +                                        |
| Proline arylamidase                        | +                    | +                                        |
| Leucyl glycine arylamidase                 | +                    | +                                        |
| Phenyl alanine arylamidase                 | +                    | +                                        |
| Leucine arylamidase <sup>a</sup>           | +                    | -                                        |
| Pyroglutamic acid arylamidase <sup>a</sup> | +                    | -                                        |
| Tyrosine arylamidase                       | +                    | +                                        |
| Alanine arylamidase <sup>a</sup>           | +                    | -                                        |
| Glycine arylamidase                        | +                    | +                                        |
| Histidine arylamidase                      | +                    | +                                        |
| Glutamyl glutamic acid arylamidase         | +                    | +                                        |
| Serine arylamidase                         | +                    | +                                        |

<sup>a</sup>Sugar assimilation of *R. gnavus* N53 differs from ATCC 29149<sup>T</sup> using  $\alpha$ -fucosidase, leucine arylamidase, pyroglutamic acid arylamidase, and alanine arylamidase.

Symbols: -, negative reaction; +, positive reaction. Where two symbols are shown, the first was more frequent, and the second was observed less frequently.
